# Supplementary material
Source: PubMed Central journal article supplement (PMC5846162)
Supplement: supp_RA117.001222_134315_1_supp_55274_p2ltjh.pdf [file supp_RA117.001222_134315_1_supp_55274_p2ltjh.pdf]

**Identification of an  $\omega$ -aminotransferase required for  
proline biosynthesis in the archaeon *Thermococcus kodakarensis***

Ren-Chao Zheng<sup>1,3†</sup>, Shin-ichi Hachisuka<sup>1,5†</sup>, Hiroya Tomita<sup>1</sup>, Tadayuki Imanaka<sup>2,5</sup>, Yu-Guo Zheng<sup>3</sup>, Makoto Nishiyama<sup>4</sup>, and Haruyuki Atomi<sup>1,5\*</sup>

<sup>1</sup>*Department of Synthetic Chemistry and Biological Chemistry, Graduate School of Engineering, Kyoto University, Katsura, Nishikyo-ku, Kyoto 615-8510, Japan*

<sup>2</sup>*Department of Biotechnology, College of Life Science, Ritsumeikan University Noji-Higashi, Kusatu, Shiga, Japan*

<sup>3</sup>*College of Biotechnology and Bioengineering, Zhejiang University of Technology, Hangzhou 310032, People's Republic of China*

<sup>4</sup>*Biotechnology Research Center, The University of Tokyo, 1-1-1, Yayoi, Bunkyo-ku Tokyo 113-8657, Japan*

<sup>5</sup>*JST, CREST, 7, Gobancho, Chiyoda-ku, Tokyo 102-0076, Japan*

† The authors contributed equally to this work

\* **Corresponding author:** Haruyuki Atomi, [atomi@sbchem.kyoto-u.ac.jp](mailto:atomi@sbchem.kyoto-u.ac.jp)

Supplemental materials

Table S1. Primers used in this study

| Name   | Sequences                                                         |
|--------|-------------------------------------------------------------------|
| 2101F1 | 5'-TCATAAGCAAAGACCTCGGCGG-3'                                      |
| 2101R1 | 5'-GCTCTTGAGATGATAGAGGCTGG-3'                                     |
| 2101F2 | 5'-ATGACGGATATAATAAGCGAGCTTG-3'                                   |
| 2101R2 | 5'-GCGCATCACCGGAGGAACGTTGTC-3'                                    |
| 2101F3 | 5'-AAC <u>CATATG</u> CACCACCACCACCACGTGGTTAGACCGAAC<br>GTTAAAG-3' |
| 2101R3 | 5'-AAG <u>TCGACT</u> CACTTCAGAGCCGCTTTGAGGGCC-3'                  |
| 2101F4 | 5'-AAGA <u>ATTCT</u> ATCGGCAAAGGCGAATTATGTG-3'                    |
| 2101R4 | 5'-AAG <u>CATGCG</u> TTGAGGAAGCGGAGGTTCCAAG-3'                    |

Recognition sites of restriction enzymes are indicated with underlines.



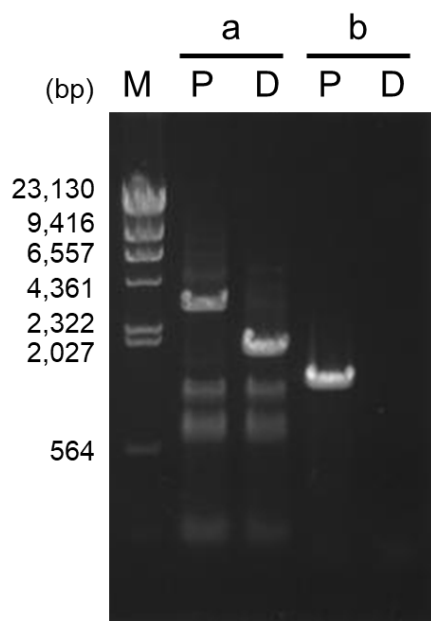

Fig. S2. PCR analysis of the TK2101 locus. The outside (a) and inside (b) DNA fragments were amplified using the primer set 2101F1/2101R1 and 2101F3/2101R3, respectively. Abbreviations: M; Marker, P; *T. kodakarensis* parent strain KU216, D; TK2101 gene disruption strain.
